1      Establishment of baseline sensitivity of *Rhizoctonia*  
2      *solani* to thifluzamide in corn and its field application

3      **Author:** Dianlong Shang<sup>1,2\*</sup>, Chentao Yao<sup>1,2</sup>, Falin He<sup>1,2</sup>, Xiao Sun<sup>1,2</sup>, Shiang Sun<sup>1,2</sup>,  
4      Haili Tan<sup>1,2</sup>, Xiangdong Li<sup>1</sup>, Jiwang Zhang<sup>3</sup>, Xingyin Jiang<sup>1,2\*</sup>

5      <sup>1</sup>College of Plant Protection Shandong Agricultural University, Tai'an, Shandong  
6      271018, P.R. China

7      <sup>2</sup>Key Laboratory of Pesticide Toxicology & Application Technique, Tai'an, Shandong  
8      271018, P.R. China

9      <sup>3</sup>State Key Laboratory of Crop Biology, College of Agronomy, Shandong  
10      Agricultural University, Tai'an, Shandong 271018, P.R. China

11

12

13

14

15

16

17

18

19      **\* Corresponding author:**

20      Dianlong Shang ; E-mail: 13320356@qq.com

21      Xingyin Jiang; E-mail: [xyjiang@sdau.edu.cn](mailto:xyjiang@sdau.edu.cn)

## 22 **Abstract**

23 In recent years, banded leaf sheath blight in corn has become an important disease  
24 in corn that seriously affects quality and yield. This paper aims to evaluate the  
25 sensitivity of *Rhizoctonia solani* to thifluzamide in corn, to clarify the effect of seed  
26 coating using a thifluzamide suspension agent on safety and physiological indicators  
27 and to determine banded leaf sheath blight in corn control effectiveness in the field,  
28 thereby providing a basis for the application of thifluzamide suspension agent as a  
29 seed coating. In this study, the thifluzamide sensitivity of 102 strains of *R. solani* in  
30 corn in different regions of Shandong was determined using the mycelial growth rate  
31 method, and the average half-maximal effective concentration value ( $EC_{50}$ ) was  
32  $0.086\pm 0.004$   $\mu\text{g/mL}$ . The sensitivity was consistent with a continuous and skewed  
33 normal distribution, and the sensitivity distribution frequency exhibited a continuous,  
34 unimodal curve, indicating that thifluzamide had strong inhibitory activity on the  
35 mycelial growth of *R. solani* in corn. The impacts of using a thifluzamide suspension  
36 agent for seed coating on safety and physiological indicators as well as the control  
37 effect in corn were evaluated by combining seed coating, an indoor pot test, and a  
38 field trial. The root activities under 24 g a.i.  $100\text{ kg}^{-1}$  seed and 12 g a.i.  $100\text{ kg}^{-1}$  seed  
39 were found to increase by 78.01% and 77.40%, respectively, compared with that  
40 under the blank control; the chlorophyll content of corn increased most significantly  
41 at a dosage of 24 g a.i.  $100\text{ kg}^{-1}$ , which was a 32.32% increase compared to the blank  
42 control. Thifluzamide (FS) could significantly increase the hundred-grain weight of  
43 corn and the per-plot yield. Among the examined dosages, 24 g a.i.  $100\text{ kg}^{-1}$  seed had

44 the most significant treatment effect, with the hundred-grain weight increasing by  
45 12.47% and the yield rate increasing by 15.72% compared to the control in 2016,  
46 Simultaneously, the hundred-grain weight increasing by 13.44% and the yield rate  
47 increasing by 14.11% compared to the control in 2017. Three dosages of 24%  
48 thifluzamide (FS) increased the emergence rate and seedling growth of corn to  
49 varying extents. The field control effectiveness against banded leaf sheath blight in  
50 corn was best at the dosage of 24 g a.i. 100 kg<sup>-1</sup> seed for seed dressing with  
51 thifluzamide (FS); in 2016 and 2017, the control effects in the small bell stage, large  
52 bell stage, tasseling and pollen-shedding stage, silking stage, milk-ripening stage, and  
53 wax-ripening stage were 100%, 66.73%, 52.8%, 67.81%, 68.48%, and 62.68%  
54 (2016), respectively, and 74.97%, 63.17%, 50.90%, 53.60%, 61.42%, and 55.88%  
55 (2017). These results indicated that thifluzamide had enormous potential for  
56 controlling banded leaf sheath blight in corn.

## 57 **Introduction**

58 To promote the integrated control of air pollution to construct an ecological  
59 civilization in recent years, straw burning has been fully prohibited, while straw  
60 returning has been widely promoted in various places throughout China. However,  
61 due to improper treatment methods, straw returning has provided habitats for many  
62 soil-borne pathogens. As an important cereal crop in the global agricultural economy  
63 [1], corn is critical to increasing grain yield, but the incidence of banded leaf sheath  
64 blight in corn has been increasing annually, resulting in a decline in the quality and  
65 yield of corn and serious economic losses. Currently, farmers have a weak sense of

66 prevention and control of banded leaf sheath blight in corn, and there is little use of  
67 control agents. Therefore, the development of safe, efficient agents for the prevention  
68 and treatment of this disease is urgently needed.

69 *Rhizoctonia* spp [2]. are destructive soilborne pathogens of many crops around  
70 the world that can utilize organic residues in the soil during the saprophytic period to  
71 survive as an aseptical mycelium (mycelium or sclerotia) [3,5]. Banded leaf sheath  
72 blight in corn is a soil-borne disease caused by infection by fungi in the soil habitat  
73 [6] such as *Rhizoctonia cerealis*, *Rhizoctonia solani*, and *Rhizoctonia zeae*.  
74 *Rhizoctonia solani* is a dominant pathogen in Shandong Province, China [7]. Its  
75 sexual stage is *Thanatephorus cucumeris*, and its main races include AG-1-IA,  
76 AG-1-IB, AG-3, AG-5, AG-A, and AG-K [8,9,10]. The isolated strain of AG-1-IA  
77 readily causes banded leaf sheath blight in corn [11]. Disease incidence can span from  
78 the seedling period to the late growth period and be severe in the event of crop  
79 rotation [4,5]. The infection begins at the base of the leaf sheath, and peak damage  
80 occurs during the period from tasselling (VT) to grain filling. Initially, leaf sheaths  
81 have dark-green hygrophanous spots that gradually develop into cloud-shaped/wavy  
82 or irregular lesions from the bottom upward. The lesions are brown with the colour  
83 gradually becoming lighter from the outside to the inside; then, the lesions continue to  
84 expand and result in rotting of the leaf sheaths. In severe cases, stems become rotted  
85 and lodged/broken [12,13], and ears and grains become infested, causing insufficient  
86 grain filling, which seriously affects the quality and yield of corn[14].

87 At present, the methods for preventing and controlling banded leaf sheath blight

88 in corn mainly include agricultural control, biological control, and chemical control,  
89 among which agricultural control has a limited effect and is time and labour  
90 consuming. Biological control has become an important area of research in plant  
91 protection in recent years. Tagele found that KNU17BI1 has great potential to control  
92 banded leaf sheath blight in corn caused by *R. solani* AG-1 (IA) [15], but the control  
93 effect is not ideal due to the limits of the growth environment. Hence, chemical  
94 control is still the most important prevention and control method in agricultural  
95 production. A previous study showed that the control effect of 25% triadimefon  
96 wettable powder (WP) could reach 44.17% when a 200-fold solution is applied for  
97 soil disinfection [16], and the control effect of 20% Jinggong mycin (AF) in fertilizer  
98 can exceed 80.1%. In addition, triazole fungicides, such as tebuconazole, have been  
99 used. Traditional control methods involve foliar spraying during the corn tasseling  
100 stage, which is limited by the height of the corn plants and is time-consuming and  
101 labourious. Thifluzamide is a thiazole amide fungicide that has both protection and  
102 treatment effects, and it can be used as a foliar spray or for soil treatment and can be  
103 quickly absorbed by plants. Thifluzamide is mainly used to prevent and control  
104 diseases caused by *Rhizoctonia* spp. of the phylum Basidiomycota [17,18].

105 Corn seed coating technology has also been widely used in corn planting.  
106 Through seed coating, the active ingredients of fungicides/pesticides are slowly  
107 released, which can, to some extent, enhance plant resistance and promote plant  
108 growth [19,20,21], thus having beneficial effects for corn [22]. In China, thifluzamide  
109 has achieved a good control effect as an agent against rice sheath blight. However,

110 this effect has not been registered for corn, and no study on the control of banded leaf  
111 sheath blight in corn by seed dressing with thifluzamide has been reported. As a  
112 specific control agent of *Rhizoctonia* spp., investigating thifluzamide (FS) for the  
113 prevention and control of banded leaf sheath blight in corn is of great value. In this  
114 study, the baseline sensitivity of *R. solani* to thifluzamide was established in corn; the  
115 safety of thifluzamide coating was evaluated in corn, and the effects of thifluzamide  
116 on physiological and biochemical indicators of corn and its control of banded leaf  
117 sheath blight in corn were studied through pot and field fungicide tests to provide a  
118 basis for the application of a thifluzamide suspension agent for seed coating.

## 119 **Materials and methods**

### 120 **Test materials**

121 Test strains: In 2016-2017, diseased leaf sheaths, leaves, and stalks subjected to  
122 banded leaf sheath blight in corn were collected in 6 regions of Shandong, China:  
123 Tai'an (TA), Linyi (LY), Weifang (WF), Laiwu (LW), Rizhao (RZ), and Qingdao  
124 (QD). Upon isolation and purification, 102 strains of *R. solani* in corn were obtained.  
125 The sampling fields were never exposed to any thifluzamide or other SDHI. The  
126 identities of all isolates in the study were confirmed by morphology, phylogenetic  
127 analysis and pathogenicity testing. Isolates were kept for long-term storage in  
128 cryogenic tubes with 15% glycerol solution at  $-80^{\circ}\text{C}$ . The test corn variety in this  
129 study was Zhengdan 958, (Henan Goldoctor Seed Co., Ltd., China). Test agents: The  
130 thifluzamide (96% TC; Shandong Kangqiao Bio-technology Co., Ltd.); the  
131 tebuconazole (94.7% TC; Shandong Weifang Runfeng Chemical Co., Ltd.); the

132 thifluzamide (24% FS; made in the laboratory; Contains the following materials:  
133 FS3000, FS7PG, 2%XG, Deionized water, Magnesium aluminium silicate, White  
134 carbon black, LXC, D625, EP60P, Film former); and the 60 g/liter tebuconazole (FS)  
135 was provided by Bayer CropScience (China) Co., Ltd.

### 136 **Establishment of baseline sensitivity of *Rhizoctonia solani* to** 137 **thifluzamide in corn**

138 The mycelial growth rate method was used to determine the susceptibility of each  
139 of the 102 strains to thifluzamide, and a baseline sensitivity was established.  
140 Thifluzamide was dissolved with acetone and was prepared as a 500- $\mu$ g/mL stock  
141 solution with 0.1% Tween-80 and sterilized deionized water. Using the stock solution  
142 for dilution, drug-containing PDA plates with thifluzamide concentrations of 1, 0.5,  
143 0.25, 0.125, and 0.0625  $\mu$ g/ml were prepared; a PDA plate with the same volume of  
144 sterilized water was used as a control. A puncher (5 mm in diameter) was sterilized;  
145 Mycelial plugs (5  $\times$  5 mm) were cut from the periphery of 3-day-old colonies of each  
146 isolate a mycelia-carrying disc was taken at the edge of the fungal colonies, and the  
147 mycelial disc was transferred to a plate with an inoculation needle, with the mycelia  
148 facing downward. Four replicates were included for each treatment. Plates were  
149 placed in a 25°C biochemical incubator for 4 days, and the colony diameter (minus  
150 the original diameter of the inoculation plug) was determined as the average of two  
151 perpendicular measurements. Calculate the mycelial growth inhibition rate and a  
152 virulence regression equation was established to obtain the half-maximal effective  
153 concentration (EC<sub>50</sub>) value. The experiment was performed twice.

## 154 **Safety test**

155 The safety test was conducted by referring to "Crop safety evaluation criteria for  
156 farm chemicals" and "Indoor test methods for crop safety evaluation of seed treatment  
157 agents" NY/T1965.3-2013(People's Republic of China Agricultural Industry  
158 Standard), and the experimental setup was as follows: Before seed sowing, fully  
159 developed corn seeds of uniform size were selected for disinfection and placed in  
160 sterilized river sand (60 to 70 mesh) in germination boxes(ABS material, transparent,  
161 360mm×29mm×12mm in volume) with the moisture content controlled at 60% to  
162 80%. For each treatment, 1 kg of seed was dressed uniformly and air dried. The  
163 thifluzamide (24% FS) dosages were set as 192 g a.i. 100 kg<sup>-1</sup> seed, 96 g a.i. 100 kg<sup>-1</sup>  
164 seed, 48 g a.i. 100 kg<sup>-1</sup> seed, 24 g a.i. 100 kg<sup>-1</sup> seed, 12 g a.i. 100 kg<sup>-1</sup> seed, 6 g a.i.  
165 100 kg<sup>-1</sup> seed, and a control (CK). Thus, a total of 7 treatments were included with 4  
166 replicates per treatment and 50 seeds per replicate. A label was pasted on the side of  
167 each germination box with the sample number, species name, and time. Germination  
168 boxes were maintained in a GXZ light incubator (28°C, 14 h of light). On the 7th day  
169 after establishment, the germination rate, seedling height, root length, root number,  
170 and fresh plant weight were measured, and the germination index and vigour index  
171 were calculated. The experiment was performed three times.

$$172 \text{ Germination index (Gi)} = \sum \frac{G_t}{D_t} \quad (1)$$

$$173 \text{ Vigour index (Vi)} = S \sum \frac{G_t}{D_t} = S \times \text{Gi} \quad (2)$$

174 Note: where  $G_t$  is the number of germinated seedlings on the  $T^{\text{th}}$  day;  $D_t$  is the  
175 corresponding days needed for germination; and  $S$  is the fresh weight per plant on the



176 7<sup>th</sup> day.

## 177 **Greenhouse pot test**

178 The greenhouse pot test included a total of 6 treatments: the 24% thifluzamide  
179 (FS) dosages of 48 g a.i. 100 kg<sup>-1</sup> seed, 24 g a.i. 100 kg<sup>-1</sup> seed, 12 g a.i. 100 kg<sup>-1</sup> seed,  
180 6 g a.i. 100 kg<sup>-1</sup> seed, the control agent tebuconazole at a dosage of 12 g a.i. 100 kg<sup>-1</sup>  
181 seed, and CK. The root activity and chlorophyll content of corn were sampled at the  
182 3-leaf stage. The root activity was determined by the TTC reduction method [23], and  
183 the chlorophyll concentration was determined by the extraction method of Ming et al  
184 [24,25]. The experiment was performed three times.

## 185 **Field fungicide test**

186 The test site was established in Ningyang County of Tai'an City in field plots  
187 where the incidence of sheath blight was severe. The test plots had a total acreage of  
188 1,000 m<sup>2</sup>. The soil was loam with uniform fertility, and the irrigation conditions were  
189 good. In the 2016 test, seed sowing occurred on June 21, and harvest occurred on  
190 September 24; in the 2017 test, seed sowing occurred on June 19, and harvest  
191 occurred on September 21. Seeding with mealie socket seeder(Zhengzhou Minle  
192 Agricultural Machinery Co., Ltd.), first adjust the sowing depth to 30 mm, insert the  
193 tip of the mealie socket seeder into the soil, the seeds fall into the soil, pull out the  
194 mealie socket seeder, and level the soil with the foot. Sowing was implemented using  
195 the single-seed dibble seeding method with 2 rows per film and plant spacing of 22  
196 cm and row spacing of 45 cm. The dosages of 24% thifluzamide (FS) included 48 g  
197 a.i. 100 kg<sup>-1</sup> seed, 24 g a.i. 100 kg<sup>-1</sup> seed, and 12 g a.i. 100 kg<sup>-1</sup> seed; the control

198 fungicide tebuconazole was applied at a dosage of 12 g a.i. 100 kg<sup>-1</sup> seed; and seed  
199 dressing treatments without thifluzamide were taken as a control. Thus, there was a  
200 total of 5 treatments in a randomized block design with 3 replicates per treatment, and  
201 each plot was 30 m<sup>2</sup>. Corn seedlings were evaluated as follows. One week after  
202 planting, 5 sites were sampled in each plot, and 30 plants were surveyed at each site.  
203 On the 10<sup>th</sup> day after sowing, 5 sites were sampled in each plot, and 15 plants were  
204 excavated to investigate plant height, stem thickness, root length, and the number of  
205 fibrous roots. The fresh plants were weighed, and the root-to-crown ratio was  
206 calculated. Before the corn was harvested, 5 sites were sampled for each plot, and  
207 samples were brought back to the laboratory for investigation, which included ear  
208 length, ear thickness, number of rows per ear, number of grains per ear, and the  
209 hundred-grain weight. The yield per 667m<sup>2</sup> and yield increase rate were calculated as  
210 well. The condition index of banded leaf sheath blight in corn was investigated at the  
211 small bell stage, large bell stage, tasseling and pollen-shedding stage, silking stage,  
212 milk-ripening stage, and wax-ripening stage. At each plot, 5 sites were diagonally  
213 sampled, and 20 plants were surveyed at each site to determine the number of  
214 diseased plants and the disease grades. The disease rate, condition index, and control  
215 effect were calculated according to Eqs. (6), (7), and (8), respectively. The disease  
216 grading was conducted according to the grading standards of the International Maize  
217 and Wheat Improvement Center (CIMMYT) (Table 1).

218 **Table 1. Grading standard for corn sheath blight.**

| Disease grade | Typical value | Grading standard                        |
|---------------|---------------|-----------------------------------------|
| 0             | 0             | No disease incidence in the whole plant |

|   |   |                                                                                              |
|---|---|----------------------------------------------------------------------------------------------|
| 1 | 1 | Disease incidence at sheaths, at and above the 4 <sup>th</sup> sheath below the ear position |
| 2 | 3 | Disease incidence at sheaths, at and above the 3 <sup>rd</sup> sheath below the ear position |
| 3 | 5 | Disease incidence at sheaths, at and above the 2 <sup>nd</sup> sheath below the ear position |
| 4 | 7 | Disease incidence at sheaths, at and above the 1 <sup>st</sup> sheath below the ear position |
| 5 | 9 | Disease incidence at the ear position and at sheaths above the ear position                  |

---

## 219 **Data processing**

220 All data were processed using SAS statistical software package (version 9.2;  
221 SAS). The EC<sub>50</sub> values of each isolate were calculated by plotting the relative  
222 inhibition against the log<sub>10</sub> of the fungicide concentration used. To detect differences  
223 between treatments, the means of control efficacy were arcsine transformed, then  
224 compared with Fisher's Least Significant Difference test (LSD, P<0.05).

## 225 **Results**

### 226 **Establishment of baseline sensitivity of *Rhizoctonia solani* to** 227 **thifluzamide in corn**

228 The sensitivity of 102 strains of *R. solani* in corn to thifluzamide was determined  
229 using the mycelial growth rate method. It was shown that *R. solani* was highly  
230 sensitive to thifluzamide, with an EC<sub>50</sub> range of 0.0103-0.1942 and an EC<sub>50</sub> average  
231 value of 0.086±0.004 µg/m. The skewness=0.298, kurt=-0.298, and p=0.0884>0.05,  
232 which agrees with continuous skewed normal distribution, and the sensitivity  
233 frequency distribution had a continuous unimodal curve (Figure 1) and can be used as  
234 the baseline sensitivity of *R. solani* in corn to thifluzamide in the Shandong region.

235 **Fig 1. Frequency distributions of 50% effective concentration (EC<sub>50</sub>) of 102 *R.***  
236 ***solani* in corn isolates treated with thifluzamide based on mycelial growth. EC<sub>50</sub>**

237 values were calculated by performing a regression of the percentage relative  
238 growth against the  $\log_{10}$  fungicide concentration.

### 239 **Safety of thifluzamide in corn**

240 Thifluzamide (24% FS) was generally safe for corn, but excessive use (192 g a.i.  
241  $100 \text{ kg}^{-1}$  seed) had an adverse effect on indicators, including seedling height, root  
242 length, and germination rate. When the dosage was 6-96 g a.i.  $100 \text{ kg}^{-1}$  seed, corn was  
243 safe, and the dosage of 12 g a.i.  $100 \text{ kg}^{-1}$  seed promoted plant height, root length, root  
244 number, the root-to-crown ratio, and the germination index. The dosage of 6 g a.i.  $100$   
245  $\text{kg}^{-1}$  seed had the most favourable effect on the seedling emergence rate, plant fresh  
246 weight, and vigour index (Table 2).

**Table 2. Safety of thifluzamide in corn <sup>a</sup>.**

| Dosage <sup>b</sup><br>(g a.i. 100 kg <sup>-1</sup><br>seed) | Plant height<br>(cm)    | Root length<br>(cm) | Root<br>number<br>(piece) | Fresh mass<br>(g) | Germination<br>rate<br>(%) | Shoot ratio<br>(%) | Germination<br>index<br>(%) | Vigour<br>index<br>(%) |
|--------------------------------------------------------------|-------------------------|---------------------|---------------------------|-------------------|----------------------------|--------------------|-----------------------------|------------------------|
| 192                                                          | 7.99±1.05d <sup>c</sup> | 7.15±0.46c          | 5.04±0.21a                | 1.15±0.05d        | 66.67±1.26f                | 1.54±0.04d         | 9.73±0.08f                  | 11.19±0.14g            |
| 96                                                           | 14.76±0.76bc            | 11.73±0.01a         | 5.14±0.05a                | 1.67±0.17b        | 90.00±1.65d                | 1.67±0.06c         | 13.63±0.09d                 | 22.71±0.09e            |
| 48                                                           | 13.49±0.45bc            | 13.03±0.93a         | 5.22±0.71a                | 1.69±0.20b        | 93.33±1.44c                | 1.95±0.15ab        | 14.30±0.07c                 | 24.13±0.20d            |
| 24                                                           | 14.49±0.01bc            | 13.54±0.65a         | 5.25±0.32a                | 1.71±0.17b        | 95.00±2.10b                | 1.94±0.04b         | 14.88±0.02b                 | 25.41±0.08c            |
| 12                                                           | 17.98±0.02a             | 13.81±0.25a         | 5.33±0.23a                | 1.76±0.07ab       | 98.33±1.04a                | 2.06±0.05a         | 15.58±0.01a                 | 27.37±0.07b            |
| 6                                                            | 15.52±0.26b             | 13.42±0.64a         | 5.23±0.15a                | 1.83±0.04a        | 98.33±1.28a                | 1.88±0.10b         | 15.50±0.01a                 | 28.39±0.07a            |
| CK                                                           | 13.07±0.16c             | 9.1±0.24b           | 4.41±0.28b                | 1.45±0.07c        | 76.67±1.37e                | 1.73±0.12c         | 12.33±0.02e                 | 17.88±0.21f            |
| <i>p</i> -value                                              | <0.01                   | <0.01               | <0.01                     | <0.01             | <0.01                      | <0.01              | <0.01                       | <0.01                  |

<sup>a</sup> The experiments performed in the laboratory in 2016.<sup>b</sup> "Dosage" means the effective concentration.<sup>c</sup> Mean values followed by the same letter in the columns were not significantly different according to Fisher's LSD test at *P*=0.05.

## 251 **Effects of thifluzamide on root activity and chlorophyll** 252 **content**

253 Seed dressing with thifluzamide could improve the root activity and increase the  
254 chlorophyll content of corn seedlings, among which the dosages of 24 g a.i. 100 kg<sup>-1</sup>  
255 seed and 12 g a.i. 100 kg<sup>-1</sup> seed had the most significant promotional effect and  
256 outperformed the tebuconazole treatment (Figures 2 and 3).

257 **Fig 2. Effect of seed dressing with thifluzamide on the root activity of corn**  
258 **seedlings**

259 **Fig 3. Effect of seed dressing with thifluzamide on the chlorophyll content of**  
260 **corn seedlings**

## 261 **Effect of thifluzamide on field emergence of corn**

262 Three dosages of 24% thifluzamide (FS) increased the emergence rate and  
263 seedling growth of corn to varying extents. Among them, in 2016 and 2017, the 24 g  
264 a.i. 100 kg<sup>-1</sup> seed dosage had the most favourable effect on the seedling emergence  
265 rate, plant height, main root length, fibrous root number, and plant fresh weight. In  
266 2016, The seedling emergence rate was 15.91% higher than the control, and the plant  
267 height, main root length, fibrous root number, and plant fresh weight were increased  
268 by 4.16 cm, 2.94 cm, 0.87, and 0.64 g, respectively. The dosage of 12 g a.i. 100 kg<sup>-1</sup>  
269 seed had a better promotional effect on stem thickness, which was 0.75 mm higher  
270 than that of the control (Table 3). Three doses of thifluzamide (FS) significantly  
271 increased the corn root-to-crown ratio, which was obviously better than that under the  
272 tebuconazole treatment. Similarly, the 2017 study further validated the 2016

273 conclusion. 3 dosages of 24% thifluzamide (FS) increased the emergence rate and  
274 seedling growth of corn to varying extents (Table 4).

275 **Table 3. Effect of thifluzamide on field emergence of corn (2016) <sup>a</sup>.**

| Fungicide                       | Dosage<br>(g a.i. 100 kg <sup>-1</sup> seed) | Emergence<br>rate<br>(%) | Plant<br>height<br>(cm) | Stem<br>thickness<br>(mm) | Main root<br>length<br>(cm) | Fibrous root<br>number<br>(piece) | Fresh<br>weight<br>(g) | Shoot<br>ratio |
|---------------------------------|----------------------------------------------|--------------------------|-------------------------|---------------------------|-----------------------------|-----------------------------------|------------------------|----------------|
| Thifluzamide<br>(FS) 24%        | 48                                           | 92.67±1.16a              | 17.01±0.05c             | 2.93±0.11b                | 14.45±0.15b                 | 3.47±0.21c                        | 2.11±0.15bc            | 0.57±0.02ab    |
|                                 | 24                                           | 95.56±0.84a              | 18.61±0.08a             | 3.10±0.12ab               | 16.20±0.07a                 | 3.89±0.09a                        | 2.53±0.20a             | 0.61±0.02a     |
|                                 | 12                                           | 93.78±1.86a              | 18.06±0.05b             | 3.16±0.11a                | 15.58±0.16a                 | 3.76±0.04ab                       | 2.31±0.23ab            | 0.55±0.02b     |
| Tebuconazole<br>(FS) 60 g/liter | 12                                           | 95.11±1.65a              | 17.01±0.13c             | 2.95±0.03ab               | 15.39±0.08a                 | 3.56±0.15bc                       | 2.32±0.12ab            | 0.54±0.02b     |
|                                 | CK                                           | -                        | 82.44±1.92b             | 14.45±0.12d               | 2.41±0.09c                  | 13.26±0.35c                       | 3.02±0.13d             | 1.89±0.13c     |
| <i>p</i> -value                 | -                                            | <0.01                    | <0.01                   | <0.01                     | <0.01                       | <0.01                             | <0.01                  | 0.0293         |

276 **Table 4. Effect of thifluzamide on field emergence of corn (2017) <sup>b</sup>.**

| Fungicide                       | Dosage <sup>c</sup><br>(g a.i. 100 kg <sup>-1</sup> seed) | Emergence<br>rate<br>(%) | Plant<br>height<br>(cm) | Stem<br>thickness<br>(mm) | Main root<br>length<br>(cm) | Fibrous root<br>number<br>(piece) | Fresh<br>weight<br>(g) | Shoot<br>ratio |
|---------------------------------|-----------------------------------------------------------|--------------------------|-------------------------|---------------------------|-----------------------------|-----------------------------------|------------------------|----------------|
| Thifluzamide<br>(FS) 24%        | 48                                                        | 99.33±0.33a <sup>d</sup> | 16.70±0.21c             | 2.92±0.04c                | 14.24±0.00d                 | 3.44±0.17b                        | 2.29±0.08ab            | 0.58±0.03a     |
|                                 | 24                                                        | 97.33±0.67a              | 19.08±0.24a             | 3.17±0.03a                | 16.13±0.04a                 | 4.38±0.25a                        | 2.69±0.08a             | 0.62±0.02a     |
|                                 | 12                                                        | 92.67±0.88bc             | 18.09±0.34ab            | 3.13±0.03ab               | 14.79±0.14c                 | 3.78±0.20ab                       | 2.39±0.09ab            | 0.55±0.01a     |
| Tebuconazole<br>(FS) 60 g/liter | 12                                                        | 98.67±0.33a              | 17.36±0.54bc            | 2.99±0.01bc               | 15.57±0.14b                 | 3.84±0.25ab                       | 2.66±0.09a             | 0.60±0.01a     |
|                                 | CK                                                        | -                        | 90.00±0.58c             | 14.80±0.13d               | 2.49±0.00d                  | 13.85±0.02d                       | 3.16±0.10b             | 2.19±0.07b     |
| <i>p</i> -value                 | -                                                         | <0.01                    | <0.01                   | <0.01                     | <0.01                       | <0.01                             | 0.0123                 | <0.01          |

277 <sup>a</sup> The experiments performed in the field in 2016. <sup>b</sup> The experiments performed in the field in 2017.

278 <sup>c</sup> “Dosage” means the effective concentration. <sup>d</sup> Mean values followed by the same letter in the columns were not significantly different according to Fisher’s LSD test at *P*=0.05.



279

## 280 **Effects of thifluzamide on corn yield**

281 Three doses of thifluzamide could increase the ear length, ear thickness, number  
282 of rows per ear, and number of grains per ear in the field test of this study. The  
283 laboratory seed investigation showed that thifluzamide (FS) could significantly  
284 increase the 100-grain weight of corn and the yield per plot. The 24 g a.i. 100 kg<sup>-1</sup>  
285 seed treatment increased the 100-grain weight by 12.47% (2016) and 13.44% (2017)  
286 compared with the control, leading to a yield increase of 15.72% (2016) and 14.11%  
287 (2017) (Table 5 and 6).

288 **Table 5. Effects of thifluzamide on corn yield(2016) <sup>a</sup>.**

| Fungicide                      | Dosage<br>(g a.i. 100<br>kg <sup>-1</sup> seed) | Ear length<br>(cm)       | Ear width<br>(cm) | Row<br>(number/ear) | Ear grain number<br>(grains/ear) | Hundred-grain<br>weight<br>(g) | Plot yield<br>(kg) | Yield increase<br>(%) |
|--------------------------------|-------------------------------------------------|--------------------------|-------------------|---------------------|----------------------------------|--------------------------------|--------------------|-----------------------|
| Thifluzamide<br>(FS) 24%       | 48                                              | 21.19±0.52b <sup>c</sup> | 16.74±0.08ab      | 15.33±0.05a         | 506.80±3.95b                     | 31.50±0.01b                    | 24.30±0.29ab       | 9.18b                 |
|                                | 24                                              | 22.88±0.30a              | 17.12±0.06a       | 15.47±0.38a         | 516.63±0.68a                     | 32.73±0.25a                    | 25.76±0.64a        | 15.72a                |
|                                | 12                                              | 20.15±0.22b              | 16.39±0.31bc      | 15.13±0.31a         | 508.50±0.56b                     | 31.15±0.46b                    | 24.04±0.14ab       | 8.00bc                |
| Tebuconazole<br>(FS) 60g/liter | 12                                              | 20.20±0.21b              | 17.06±0.21b       | 15.00±0.34a         | 507.90±1.70b                     | 31.34±0.10b                    | 23.41±0.27b        | 5.18c                 |
| CK                             | -                                               | 17.77±0.20c              | 15.78±0.20c       | 14.73±0.38a         | 471.73±2.98c                     | 29.10±0.07c                    | 22.26±0.63b        | -                     |
| <i>p</i> -value                | -                                               | <0.01                    | <0.01             | 0.7812              | <0.01                            | <0.01                          | <0.01              | <0.01                 |

289 **Table 6. Effects of thifluzamide on corn yield(2017) <sup>b</sup>.**

| Fungicide                      | Dosage<br>(g a.i. 100<br>kg <sup>-1</sup> seed) | Ear length<br>(cm) | Ear width<br>(cm) | Row<br>(number/ear) | Ear grain number<br>(grains/ear) | Hundred-grain<br>weight<br>(g) | Plot yield<br>(kg) | Yield increase<br>(%) |
|--------------------------------|-------------------------------------------------|--------------------|-------------------|---------------------|----------------------------------|--------------------------------|--------------------|-----------------------|
| Thifluzamide<br>(FS) 24%       | 48                                              | 20.41±0.60ab       | 16.58±0.16bc      | 14.50±0.25a         | 508.2±0.001b                     | 32.38±0.16b                    | 24.79±0.29abc      | 7.50c                 |
|                                | 24                                              | 22.73±0.11a        | 17.90±0.23a       | 14.57±0.34a         | 516.5±0.000a                     | 33.26±0.23a                    | 26.31±0.08a        | 14.11a                |
|                                | 12                                              | 19.87±0.24bc       | 16.34±0.19c       | 14.73±0.37a         | 504.3±0.003b                     | 30.47±0.09c                    | 24.26±0.63bc       | 5.20d                 |
| Tebuconazole<br>(FS) 60g/liter | 12                                              | 21.17±0.23ab       | 17.35±0.14ab      | 14.47±0.07a         | 509.7±0.002b                     | 32.10±0.13b                    | 25.12±0.37ab       | 8.93b                 |
| CK                             | -                                               | 17.67±1.02c        | 15.85±0.10c       | 14.70±0.56a         | 482.4±0.003c                     | 29.32±0.25d                    | 23.06±0.16c        | -                     |
| <i>p</i> -value                | -                                               | <0.01              | <0.01             | 0.9827              | <0.01                            | <0.01                          | <0.01              | <0.01                 |

291 a The experiments performed in the field in 2016.

292 b The experiments performed in the field in 2017.

293 c Mean values followed by the same letter in the columns were not significantly different according to Fisher's  
294 LSD test at P=0.05.

## 295 **Effects of thifluzamide on the prevention of banded leaf** 296 **sheath blight in corn in the field**

297 In the field test of this study we found that there were fewer incidences of banded  
298 leaf sheath blight in corn from the seedling stage to the large bell stage, during which  
299 the control effect was high. The tasseling and pollen-shedding stage was the  
300 disease-spreading period, with high temperature and humidity conditions being  
301 conducive to the spread of sheath blight, and the maturity stage was the abrupt surge  
302 period of the disease. The 2-year field trial showed that 3 doses of thifluzamide (FS)  
303 had good control effects on banded leaf sheath blight in corn throughout the entire  
304 growth period and significantly reduced the incidence of banded leaf sheath blight in  
305 corn during the high-incidence period. Among these, the dosage of 24 g a.i. 100 kg<sup>-1</sup>  
306 seed had the optimal field control effect, and the control effects during the small bell  
307 stage, large bell stage, tasseling and pollen-shedding stage, silking stage,  
308 milk-ripening stage, and wax-ripening stage were 100%, 66.73%, 52.8%, 67.81%,  
309 68.48%, and 62.68% (2016), respectively, and 74.97%, 63.17%, 50.90%, 53.60%,  
310 61.42%, and 55.88% (2017). Through field observation and data analysis, the disease  
311 rate in the plots under the seed dressing with thifluzamide treatment was significantly  
312 higher during the period from the late wax-ripening stage to corn harvest than during  
313 other stages (Table 7).

**Table 7. Effects of thifluzamide on the prevention of corn sheath blight in the field in 2016 and 2017 <sup>a</sup>.**

| Growth period                             | Fungicide                        | Dosage<br>(g a.i. 100 kg <sup>-1</sup><br>seed) | 2016             |                     |                    | 2017             |                     |                    |
|-------------------------------------------|----------------------------------|-------------------------------------------------|------------------|---------------------|--------------------|------------------|---------------------|--------------------|
|                                           |                                  |                                                 | Disease rate (%) | Condition index (%) | Control effect (%) | Disease rate (%) | Condition index (%) | Control effect (%) |
| Small bell stage                          | Thifluzamide (FS) 24%            | 48                                              | 1.67±0.43a       | 0.19±0.14a          | 66.93±0.33b        | 8.33±0.18b       | 0.93±0.06b          | 37.44±0.56d        |
|                                           |                                  | 24                                              | 0±0.00a          | 0±0.00a             | 100±0.00a          | 3.33±0.43d       | 0.37±0.14d          | 74.97±0.32a        |
|                                           |                                  | 12                                              | 0±0.00a          | 0±0.00a             | 100±0.00a          | 5±0.01bc         | 0.56±0.01bc         | 62.46±0.23b        |
|                                           | Tebuconazole (FS) 60<br>g/liter  | 12                                              | 1.67±0.43a       | 0.19±0.14a          | 66.93±0.44b        | 6.67±0.61bc      | 0.74±0.20bc         | 49.95±0.34c        |
|                                           | CK                               | -                                               | 5±0.55a          | 0.56±0.18a          | -                  | 13.33±0.27a      | 1.48±0.08a          | -                  |
| <i>p</i> -value                           |                                  |                                                 | 0.3640           | 0.3647              | <0.01              | 0.1640           | 0.1660              | <0.01              |
| Large bell stage                          | Thifluzamide (FS) 24%            | 48                                              | 6.67±0.18b       | 0.74±0.59b          | 55.64±0.20b        | 11.67±0.15b      | 1.67±0.12bc         | 52.65±0.80b        |
|                                           |                                  | 24                                              | 5±0.55b          | 0.56±1.80b          | 66.73±0.45a        | 11.67±0.40b      | 1.3±0.12c           | 63.17±0.26a        |
|                                           |                                  | 12                                              | 6.67±0.67b       | 0.74±2.15b          | 55.64±0.60b        | 16.67±0.34ab     | 1.85±0.10abc        | 47.39±0.42c        |
|                                           | Tebuconazole (FS) 60 g/<br>liter | 12                                              | 8.33±0.33b       | 0.93±1.04b          | 44.56±0.36c        | 26.67±0.11a      | 2.96±0.03ab         | 15.82±0.62d        |
|                                           | CK                               | -                                               | 15±0.45a         | 1.67±0.73a          | -                  | 28.33±0.21a      | 3.52±0.06a          | -                  |
| <i>p</i> -value                           |                                  |                                                 | 0.4488           | 0.2450              | <0.01              | 0.0285           | 0.0298              | <0.01              |
| Tasseling and<br>pollen-shedding<br>stage | Thifluzamide (FS) 24%            | 48                                              | 20±0.63b         | 4.07±0.22b          | 38.92±0.28b        | 33.33±0.30bc     | 6.67±0.21bc         | 36.87±c            |
|                                           |                                  | 24                                              | 18.33±0.24bc     | 3.15±0.16bc         | 52.8±0.33a         | 26.67±0.20c      | 5.19±0.93c          | 50.9±a             |
|                                           |                                  | 12                                              | 25±0.32ab        | 5±0.28ab            | 25.04±0.53d        | 35.00±0.45ab     | 6.48±0.21bc         | 38.62±b            |

|                     |                                  |    |              |              |             |               |               |             |
|---------------------|----------------------------------|----|--------------|--------------|-------------|---------------|---------------|-------------|
|                     | Tebuconazole (FS) 60 g/<br>liter | 12 | 21.67±0.63b  | 4.63±0.21b   | 30.59±0.64c | 36.67±0.19ab  | 7.78±0.69ab   | 26.35±d     |
|                     | CK                               | -  | 30±0.18a     | 6.67±0.25a   | -           | 45.00±0.29a   | 10.56±1.62a   | -           |
| <i>p</i> -value     |                                  |    | 0.4435       | 0.4279       | <0.01       | <0.01         | <0.01         | <0.01       |
| Silking stage       | Thi flu zamide (FS) 24%          | 48 | 36.67±0.26b  | 9.26±1.28bc  | 42.52±0.62b | 38.33±0.27b   | 10.93±1.19ab  | 39.17±0.94c |
|                     |                                  | 24 | 26.67±0.20c  | 5.19±0.41c   | 67.81±0.42a | 31.67±0.35c   | 8.33±0.33c    | 53.6±0.53a  |
|                     |                                  | 12 | 41.67±0.27ab | 9.07±0.18bc  | 43.67±0.79b | 41.67±0.33bc  | 10.56±0.60bc  | 41.23±0.64b |
|                     | Tebuconazole (FS) 60 g/<br>liter | 12 | 41.67±0.27ab | 12.04±1.29ab | 25.28±1.31c | 46.67±0.27abc | 14.81±2.37ab  | 17.51±0.57d |
|                     | CK                               | -  | 55±0.17a     | 17.04±1.92a  | -           | 51.67±0.11a   | 17.96±0.76a   | -           |
| <i>p</i> -value     |                                  |    | 0.0121       | 0.0209       | <0.01       | 0.0654        | 0.0106        | <0.01       |
| Milk-ripeness stage | Thi flu zamide (FS) 24%          | 48 | 40±0.34bc    | 9.63±1.27b   | 43.49±0.60b | 60.00±0.2a    | 13.70±1.06b   | 41.74±0.35b |
|                     |                                  | 24 | 31.67±0.65c  | 5.37±2.59b   | 68.48±0.23a | 48.33±0.26b   | 9.07±0.09b    | 61.42±0.43a |
|                     |                                  | 12 | 41.67±0.67bc | 9.44±2.25b   | 44.57±0.25b | 53.33±0.32ab  | 16.3±0.38b    | 30.71±0.18c |
|                     | Tebuconazole (FS) 60 g/<br>liter | 12 | 48.33±0.25ab | 12.04±1.52ab | 29.36±0.30c | 56.67±0.10ab  | 17.78±0.72b   | 24.41±0.12d |
|                     | CK                               | -  | 60±0.17a     | 17.04±0.79a  | -           | 61.67±0.24a   | 23.52±2.34a   | -           |
| <i>p</i> -value     |                                  |    | 0.0197       | 0.0377       | <0.01       | 0.4185        | 0.0151        | <0.01       |
| Wax-ripeness stage  | Thi flu zamide (FS) 24%          | 48 | 53.33±2.53ab | 13.33±2.19bc | 49.3±0.37b  | 66.00±0.28a   | 21.48±2.88ab  | 31.76±0.18d |
|                     |                                  | 24 | 38.33±1.67d  | 9.81±1.59c   | 62.68±0.36a | 51.67±0.17b   | 13.89±1.83c   | 55.88±0.20a |
|                     |                                  | 12 | 41.67±1.95c  | 13.52±0.61bc | 48.6±0.14b  | 53.33±0.18b   | 21.85±0.65bc  | 30.58±0.42b |
|                     | Tebuconazole (FS) 60 g/<br>liter | 12 | 50±1.66abc   | 17.78±1.04b  | 32.4±0.28c  | 61.67±0.21ab  | 24.63±2.15abc | 21.76±0.42c |
|                     | CK                               | -  | 60±0.01a     | 26.3±0.48a   | -           | 66.67±0.34a   | 31.48±1.08a   | -           |
| <i>p</i> -value     |                                  |    | <0.01        | <0.01        | <0.01       | 0.0579        | 0.0542        | <0.01       |

316 <sup>a</sup> The experiments performed in the field in 2016 and 2017.

317 <sup>b</sup> “Dosage” means the effective concentration.

318 <sup>c</sup> Mean values followed by the same letter in the columns were not significantly different according to Fisher’s  
319 LSD test at  $P=0.05$ .

## 320 **Discussion**

321       Being a fungicide of the succinate dehydrogenase inhibitor (SDHI) type,  
322 thifluzamide inhibits the synthesis of succinate dehydrogenase [26], thereby  
323 preventing pathogens from transmitting electrons in the mitochondria [27], thus  
324 inhibiting their growth [28]. Studies have shown that thifluzamide has high inhibitory  
325 activity against *R. solani* and can be used as a more effective substitute for boscalid  
326 and Jinggang mycin to control sheath blight [29]. Hence, we established the baseline  
327 sensitivity of *R. solani* in corn to thifluzamide and found that it was highly sensitive.  
328 Of the 55 fungicides listed by the Fungicide Resistance Action Committee (FRAC),  
329 the SDHI class is growing at the fastest rate among the new compounds that have  
330 been produced and put on the market [26]. As an SDHI fungicide, thifluzamide has  
331 high biological activity, but it only has a single action site, so it runs a high risk of  
332 drug resistance [30]. A previous study found that the risk of resistance to thifluzamide  
333 is moderate in *R. solani*, which can develop resistance to QoI fungicides, and the  
334 Fungicide Resistance Action Committee (FRAC) states that the use of this fungicide  
335 should be in accordance with the manufacturer's recommended effective dose, with  
336 particular attention to adhering to safety intervals [31]. In this study, we did not spray  
337 and reduced the number of fungicide applications, and the optimal dosage was  
338 determined in the indoor safety test and the greenhouse pot experiment using the seed  
339 dressing method. When the thifluzamide dosage (24% FS) was 6-96 g a.i. 100 kg<sup>-1</sup>

340 seed, seed coating with this fungicide was safe for corn. The field study found that the  
341 seed coating treatment at the dosage of 24 g a.i. 100 kg<sup>-1</sup> had the highest field control  
342 effect on banded leaf sheath blight in corn and could provide a theoretical basis for  
343 control using thifluzamide. Thifluzamide has strong adsorption capacity in the soil,  
344 but its adsorption intensity is weak, with 19.5%-54.0% digestion in 90 days [32]. In  
345 the field test of this study, the disease rate of banded leaf sheath blight in corn at each  
346 plot treated with thifluzamide (FS) was found to significantly increase after the late  
347 milk-ripening stage, but the control effect was still higher than that of the blank  
348 control and the control fungicide. It can be basically guaranteed that thifluzamide  
349 would not be applied to corn during the whole growth period.

350       Currently, the main prevention and control measures for banded leaf sheath blight  
351 in corn are chemical. Jiang stated that the control of banded leaf sheath blight in corn  
352 should be based on agricultural methods, with seed treatment with chemical agents  
353 being the main approach. The study by Xue et al. showed that the control effect of  
354 banded leaf sheath blight in corn was significantly different when fungicide  
355 application occurred during different growth stages, and the jointing stage was the  
356 best period for application [33]. Taking the traditional fungicide Jिंगgang mycin as an  
357 example, although 2 consecutive applications by leaf sheath spraying in the early  
358 tasseling stage has a good control effect, the application method is time consuming,  
359 labourious, and causes severe air pollution at large dosages that is unsafe for natural  
360 enemies, humans, and livestock, which has caused the chemical to be banned in many  
361 countries. In addition, spraying is ineffective for controlling soil-borne diseases and

362 has a short duration of effectiveness. Furthermore, multiple applications are required,  
363 and the awareness of disease control is weak among farmers. Therefore, it is  
364 necessary to develop efficient, safe and time-saving fungicides. In this study, the  
365 control effect of thifluzamide suspension (FS) on banded leaf sheath blight in corn in  
366 the field was significantly higher than that under seed dressing with the control  
367 fungicide tebuconazole. Compared with traditional fungicide agents and fungicide  
368 application methods, thifluzamide has the advantages of an increased utilization rate,  
369 guaranteeing precise application, reduced application frequency, which saves seeds  
370 and fungicide, and reduced production costs, and it has broad prospects for  
371 development. In conjunction with the call of the public for environmental protection,  
372 biological control has also made great breakthroughs in recent years. Chaurasia et al.  
373 isolated antagonized *Bacillus subtilis*, which produces diffusive and volatile  
374 compounds that can induce the separation of the tested mycelia and conidia [34], and  
375 Stein found that the peptide and non-peptide metabolites produced by *B. subtilis* have  
376 antibacterial activities [35]. However, the effectiveness of biological control is greatly  
377 affected by environmental conditions, and it is difficult to meet expectations. In a  
378 greenhouse test, the effect of biocontrol with *B. subtilis* was lower than that of  
379 Jिंगgang mycin [36]; meanwhile, the control effect of *Trichoderma* spp. against  
380 banded leaf sheath blight in corn can reach up to 68.52% [37]. Considering various  
381 aspects such as economic benefits and natural environmental conditions, biological  
382 control still needs to be developed. Many studies have shown that SDHI fungicides  
383 have good health protection effects on plants and can promote crop growth and



384 enhance the ability of crops to tolerate adverse environments. A previous study by  
385 Lde and Dubois showed that Benodanil can prevent and control diseases caused by  
386 *Rhizoctonia* in a variety of crops and can increase yield [38], and field trials have  
387 found that Carboxin can stimulate wheat growth and increase yield [32]. When  
388 thifluzamide is applied at 240 g/L, rice leaves become broader, thicker, and greener,  
389 and rice stalks exhibit enhanced toughness, which promotes robust growth. Worthing  
390 CR et al. found that compound products such as penflufen, Emesto, and EverGol can  
391 improve the crop viability, improve resistance in plants, and increase crop quality  
392 [39]. Through a greenhouse pot test in this study, the effects of seed coating using a  
393 thifluzamide suspension agent on the root activity and chlorophyll content of corn  
394 were preliminarily determined, which showed that the fungicide had a significant  
395 promotional effect and has further research value.

## 396 **Supporting Information**

397 S1 Table. Meteorological data sheet during the test (2016)

398 S2 Table. Meteorological data sheet during the test (2017)

## 399 **Acknowledgements**

400 This study has received funding from the Technology Research and  
401 Demonstration on Reduction of Chemical Fertilizers and Pesticides in Summer Maize  
402 in Huang-Huai-Hai Region (SQ2018YFD020062-4), the Provincial Major  
403 Technological Innovation Program of Agricultural Application in Shandong, and the  
404 Shandong "double first-class" award (SYL2017-XTTD11).

## 405 **Author Contributions**

406 Conceived and designed the experiments: DLS XYJ. Performed the experiments: DLS  
407 CTY FLH XS SSS. Analysed the data: DLS HLT. Contributed  
408 reagents/materials/analysis tools: DLS XDL JWZ. Wrote the paper: DLS.

## 409 **References**

- 410 1. Akhtar J, Jha VK, Kumar A, Lal HC. Occurrence of banded leaf and sheath  
411 blight of maize in Jharkhand with reference to diversity in *Rhizoctonia solani*.  
412 *Asian Journal of Agricultural Sciences*. 2009;1(2):32-35.
- 413 2. Rashed OZA, Abdullah SNA, Alsultan WMK, Ahmad K. Genetic variability of  
414 *Rhizoctonia* spp. isolated from different hosts and locations. 2017.
- 415 3. Baker R, Martinson CA. Epidemiology of diseases caused by *Rhizoctonia solani*.  
416 *Rhizoctonia Solani Biology & Pathology*. 1970.
- 417 4. Pascual, Toda, Raymondo, Hyakumachi. Characterization by conventional  
418 techniques and PCR of *Rhizoctonia solani* isolates causing banded leaf sheath  
419 blight in maize. *Plant Pathology*. 2010;49(1):108-118.
- 420 5. Pascual CB, Raymundo AD, Hyakumachi M. Efficacy of hypovirulent  
421 binucleate *Rhizoctonia* sp. to control banded leaf and sheath blight in corn.  
422 *Journal of General Plant Pathology*. 2000;66(1):95-102.
- 423 6. Hirrel MC. First Report of Sheath Blight (*Rhizoctonia solani*) on Field Corn in  
424 Arkansas. *Plant Disease*. 1988;72(7).
- 425 7. Zhao M, Zhang Z, Li W, Pan G. Advances on research of banded leaf and sheath  
426 blight of maize. *Plant Protection*. 2006;32(1):5-8.
- 427 8. Jhm S, Salazar O, Rubio V, Keijer J. Identification of *Rhizoctonia solani*

- 428 associated with field-grown tulips using ITS rDNA polymorphism and pectic  
429 zymograms. *European Journal of Plant Pathology*. 1997;103(7):607-622.
- 430 9. Ogoshi A. Ecology and Pathogenicity of Anastomosis and Intraspecific Groups  
431 of *Rhizoctonia Solani* Kuhn. *Annual Review of Phytopathology*.  
432 1987;25(1):125-143.
- 433 10. Sneh B, Burpee L, Ogoshi A. Identification of *Rhizoctonia* species. *Brittonia*.  
434 1991.
- 435 11. Li HR, Wu BC, Yan SQ. Aetiology of *Rhizoctonia* in sheath blight of maize in  
436 Sichuan. *Plant Pathology*. 1998;47(1):16–21.
- 437 12. Abendroth L, Elmore RW, Boyer M, Marlay S. Corn growth and development.  
438 2011.
- 439 13. Jackson TA. Reemergence of Goss’s Wilt and Blight of Corn to the Central High  
440 Plains. *Plant Health Progress*. 2007.
- 441 14. Yan JM, Zheng J, Hua-Zhi YE, Zhang M, Qin Y. Damage and Yield Loss in  
442 Corn Caused by Corn Sheath Blight. *Journal of Maize Sciences*.  
443 2008;16(5):123-125.
- 444 15. Tagele SB, Sang WK, Lee HG, Kim HS, Lee YS. Effectiveness of multi-trait  
445 *Burkholderia contaminans* KNU17BI1 in growth promotion and management of  
446 banded leaf and sheath blight in maize seedling. *Microbiological Research*. 2018.
- 447 16. Li S. Experiment on the control of maize sheath blight by triadimefon. 2003.
- 448 17. Mu W, Wang Z, Bi Y, Ni X, Hou Y, Zhang S, et al. Sensitivity determination  
449 and resistance risk assessment of *Rhizoctonia solani* to SDHI fungicide

- 450 thifluzamide. *Annals of Applied Biology*. 2017;170(2):240-250.
- 451 18. Wei-Qun HU, Song HM, Zhu WG, Zhang RR, Chen J. Synergistic and Field  
452 Effects of Thifluzamide and Fludioxonil against *Rhizoctonia solani*.  
453 *Agrochemicals*. 2014.
- 454 19. Arias Rivas B, Mcgee D, Burris JS. Evaluación del potencial de polímeros como  
455 agentes envolventes de fungicidas en el tratamiento de semillas de maíz para el  
456 control de *Pythium* spp. *Maria Dengosa*. 1998;67(2):152.
- 457 20. Kunkur VK, Hunje R, Biradarpatil NK, Vyakarnahal BS. Effect of Seed Coating  
458 with Polymer, Fungicide and Insecticide on Seed Quality in Cotton During  
459 Storage. *Karnataka Journal of Agricultural Sciences*. 2010;20(1).
- 460 21. Pereira CE, Oliveira JA. Qualidade fisiológica de sementes de milho tratadas  
461 associadas a polímeros durante o armazenamento Performance of corn seeds  
462 treated with furazin and maxin in association with polimers, during storage.  
463 *Ciência E Agrotecnologia*. 2005;29(6):1201-1208.
- 464 22. Avelar, GoncalvesSousa SA, Defiss FV, GuilhermeBaudet, LeopoldoPeske,  
465 Teichert S. The use of film coating on the performance of treated corn seed.  
466 *Revista Brasileira De Sementes*. 2012;34(2):186-192.
- 467 23. Baozhang B, Jin J, Huang L, Song B. Improvement of TTC Method Determining  
468 Root Activity in Corn. *Maizeence*. 1994.
- 469 24. Arnon DI. COPPER ENZYMES IN ISOLATED CHLOROPLASTS.  
470 POLYPHENOLOXIDASE IN *BETA VULGARIS*. *Plant Physiology*.  
471 1949;24(1):1-15.

- 472 25. Ming H, Chun-Sheng HU, Zhang YM, Cheng YS. Improved Extraction Methods  
473 of Chlorophyll from Maize. *Journal of Maize Sciences*. 2007.
- 474 26. Sierotzki H, Scalliet G. A review of current knowledge of resistance aspects for  
475 the next-generation succinate dehydrogenase inhibitor fungicides.  
476 *Phytopathology*. 2013;103(9):880-887.
- 477 27. Sun H, Wang C, Li W, Zhang A, Deng Y, Chen H. Characterization of  
478 *Rhizoctonia cerealis* sensitivity to thifluzamide in China. *Crop Protection*.  
479 2015;69:65-69.
- 480 28. He L, Cui K, Ma D, Shen R, Huang X, Jiang J, et al. Activity, translocation and  
481 persistence of isopyrazam for controlling cucumber powdery mildew. *Plant*  
482 *Disease*. 2017;101(7).
- 483 29. Chen Y, Zhang AF, Wang WX, Zhang Y, Gao TC. Baseline sensitivity and  
484 efficacy of thifluzamide in *Rhizoctonia solani*. *Annals of Applied Biology*.  
485 2012;161(3):247-254.
- 486 30. Ajayi-Oyetunde OO, Butts-Wilmsmeyer CJ, Bradley C. Sensitivity of  
487 *Rhizoctonia solani* to succinate dehydrogenase inhibitor and demethylation  
488 inhibitor fungicides. *Plant Disease*. 2016;101(3).
- 489 31. Liang-Kong LI, Yuan SK, Pan HY, Wang Y. Progress in Research on SDHIs  
490 Fungicides and Its Resistance. *Agrochemicals*. 2011.
- 491 32. Gupta S, Gajbhiye VT. Adsorption-desorption, persistence and leaching behavior  
492 of thifluzamide in alluvial soil. *Chemosphere*. 2004;57(6):471-480.
- 493 33. Xue T, Fu J, Zhou R. The epidemiology of corn sheath blight and its preventive

- 494 treatment. Journal of Maize Sciences. 2008;16(1):126-128.
- 495 34. Chaurasia B, Pandey A, Palni LM, Trivedi P, Kumar B, Colvin N. Diffusible and  
496 volatile compounds produced by an antagonistic *Bacillus subtilis* strain cause  
497 structural deformations in pathogenic fungi in vitro. Microbiological Research.  
498 2005;160(1):75-81.
- 499 35. Stein T. *Bacillus subtilis* antibiotics: structures, syntheses and specific functions.  
500 Molecular Microbiology. 2005;56(4):845-857.
- 501 36. Mao T, Ye H, Yuhua Q. Study on Biocontrol of Maize Sheath  
502 Blight(*Rhizoctonia solani*) with *Bacillus subtilis* Strain. Chinese Agricultural  
503 Science Bulletin. 2016.
- 504 37. Zhang G, Wen C. Biocontrol of maize sheath blight with *Trichoderma* spp.  
505 Journal of Plant Protection. 2005;32.
- 506 38. Lde LDB, Dubois C. Distribution of thiabendazole-resistant *Colletotrichum*  
507 *musae* isolates from Guadeloupe banana plantations. Plant Disease.  
508 2011;81(12):1378-1383.
- 509 39. Worthing CR, Walker SB. The pesticide manual, a world compendium. British  
510 Crop Protection Council. 1991;(2):148-148.

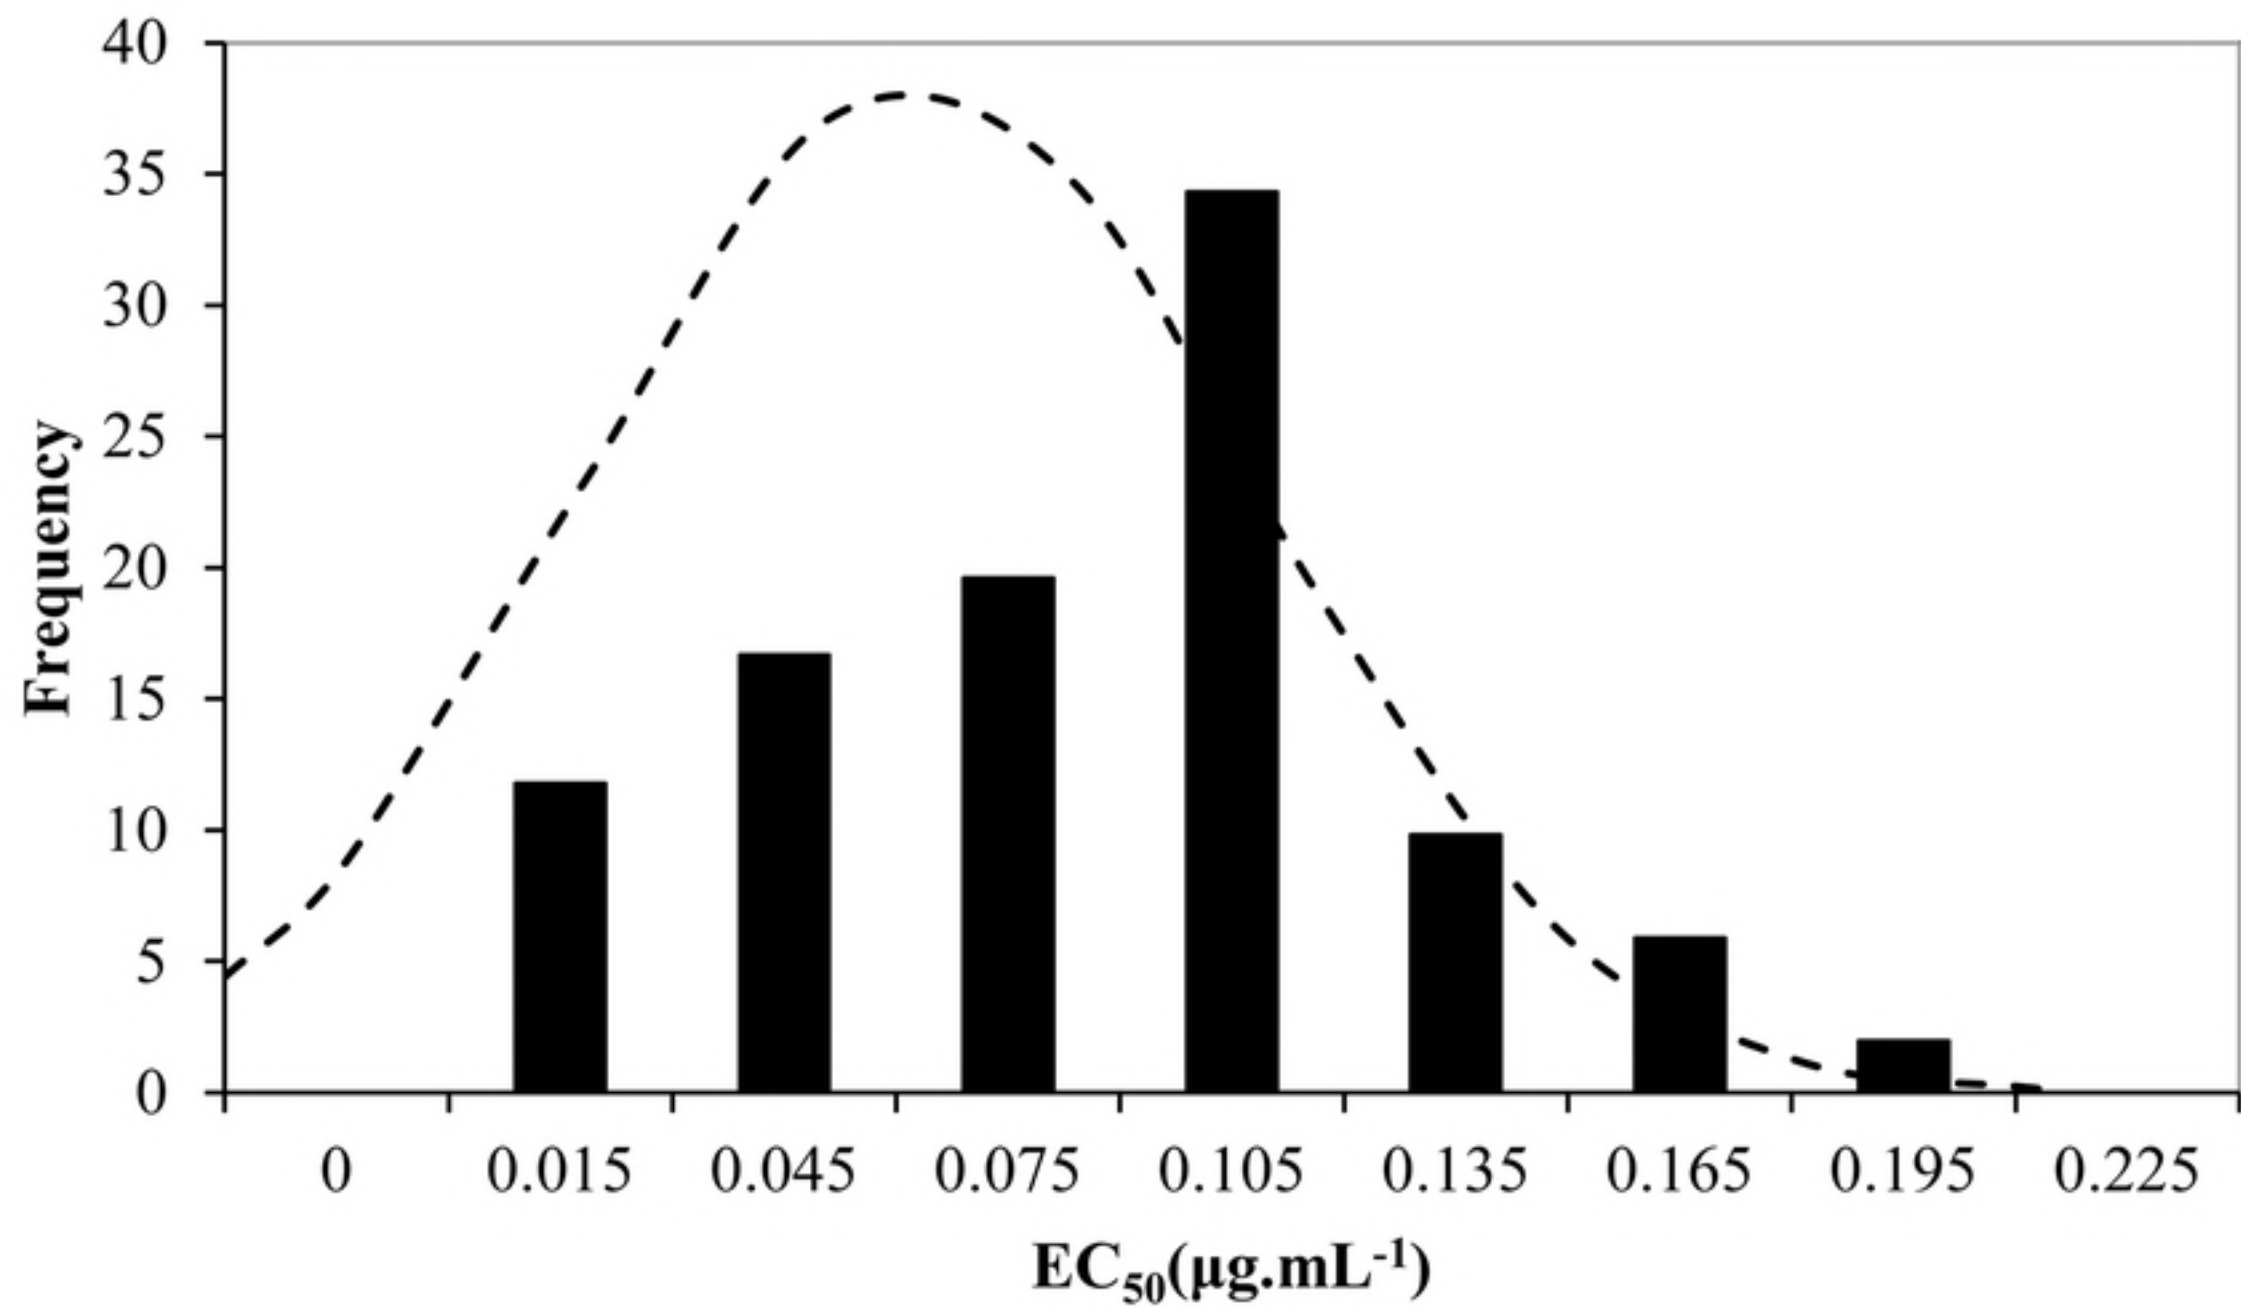

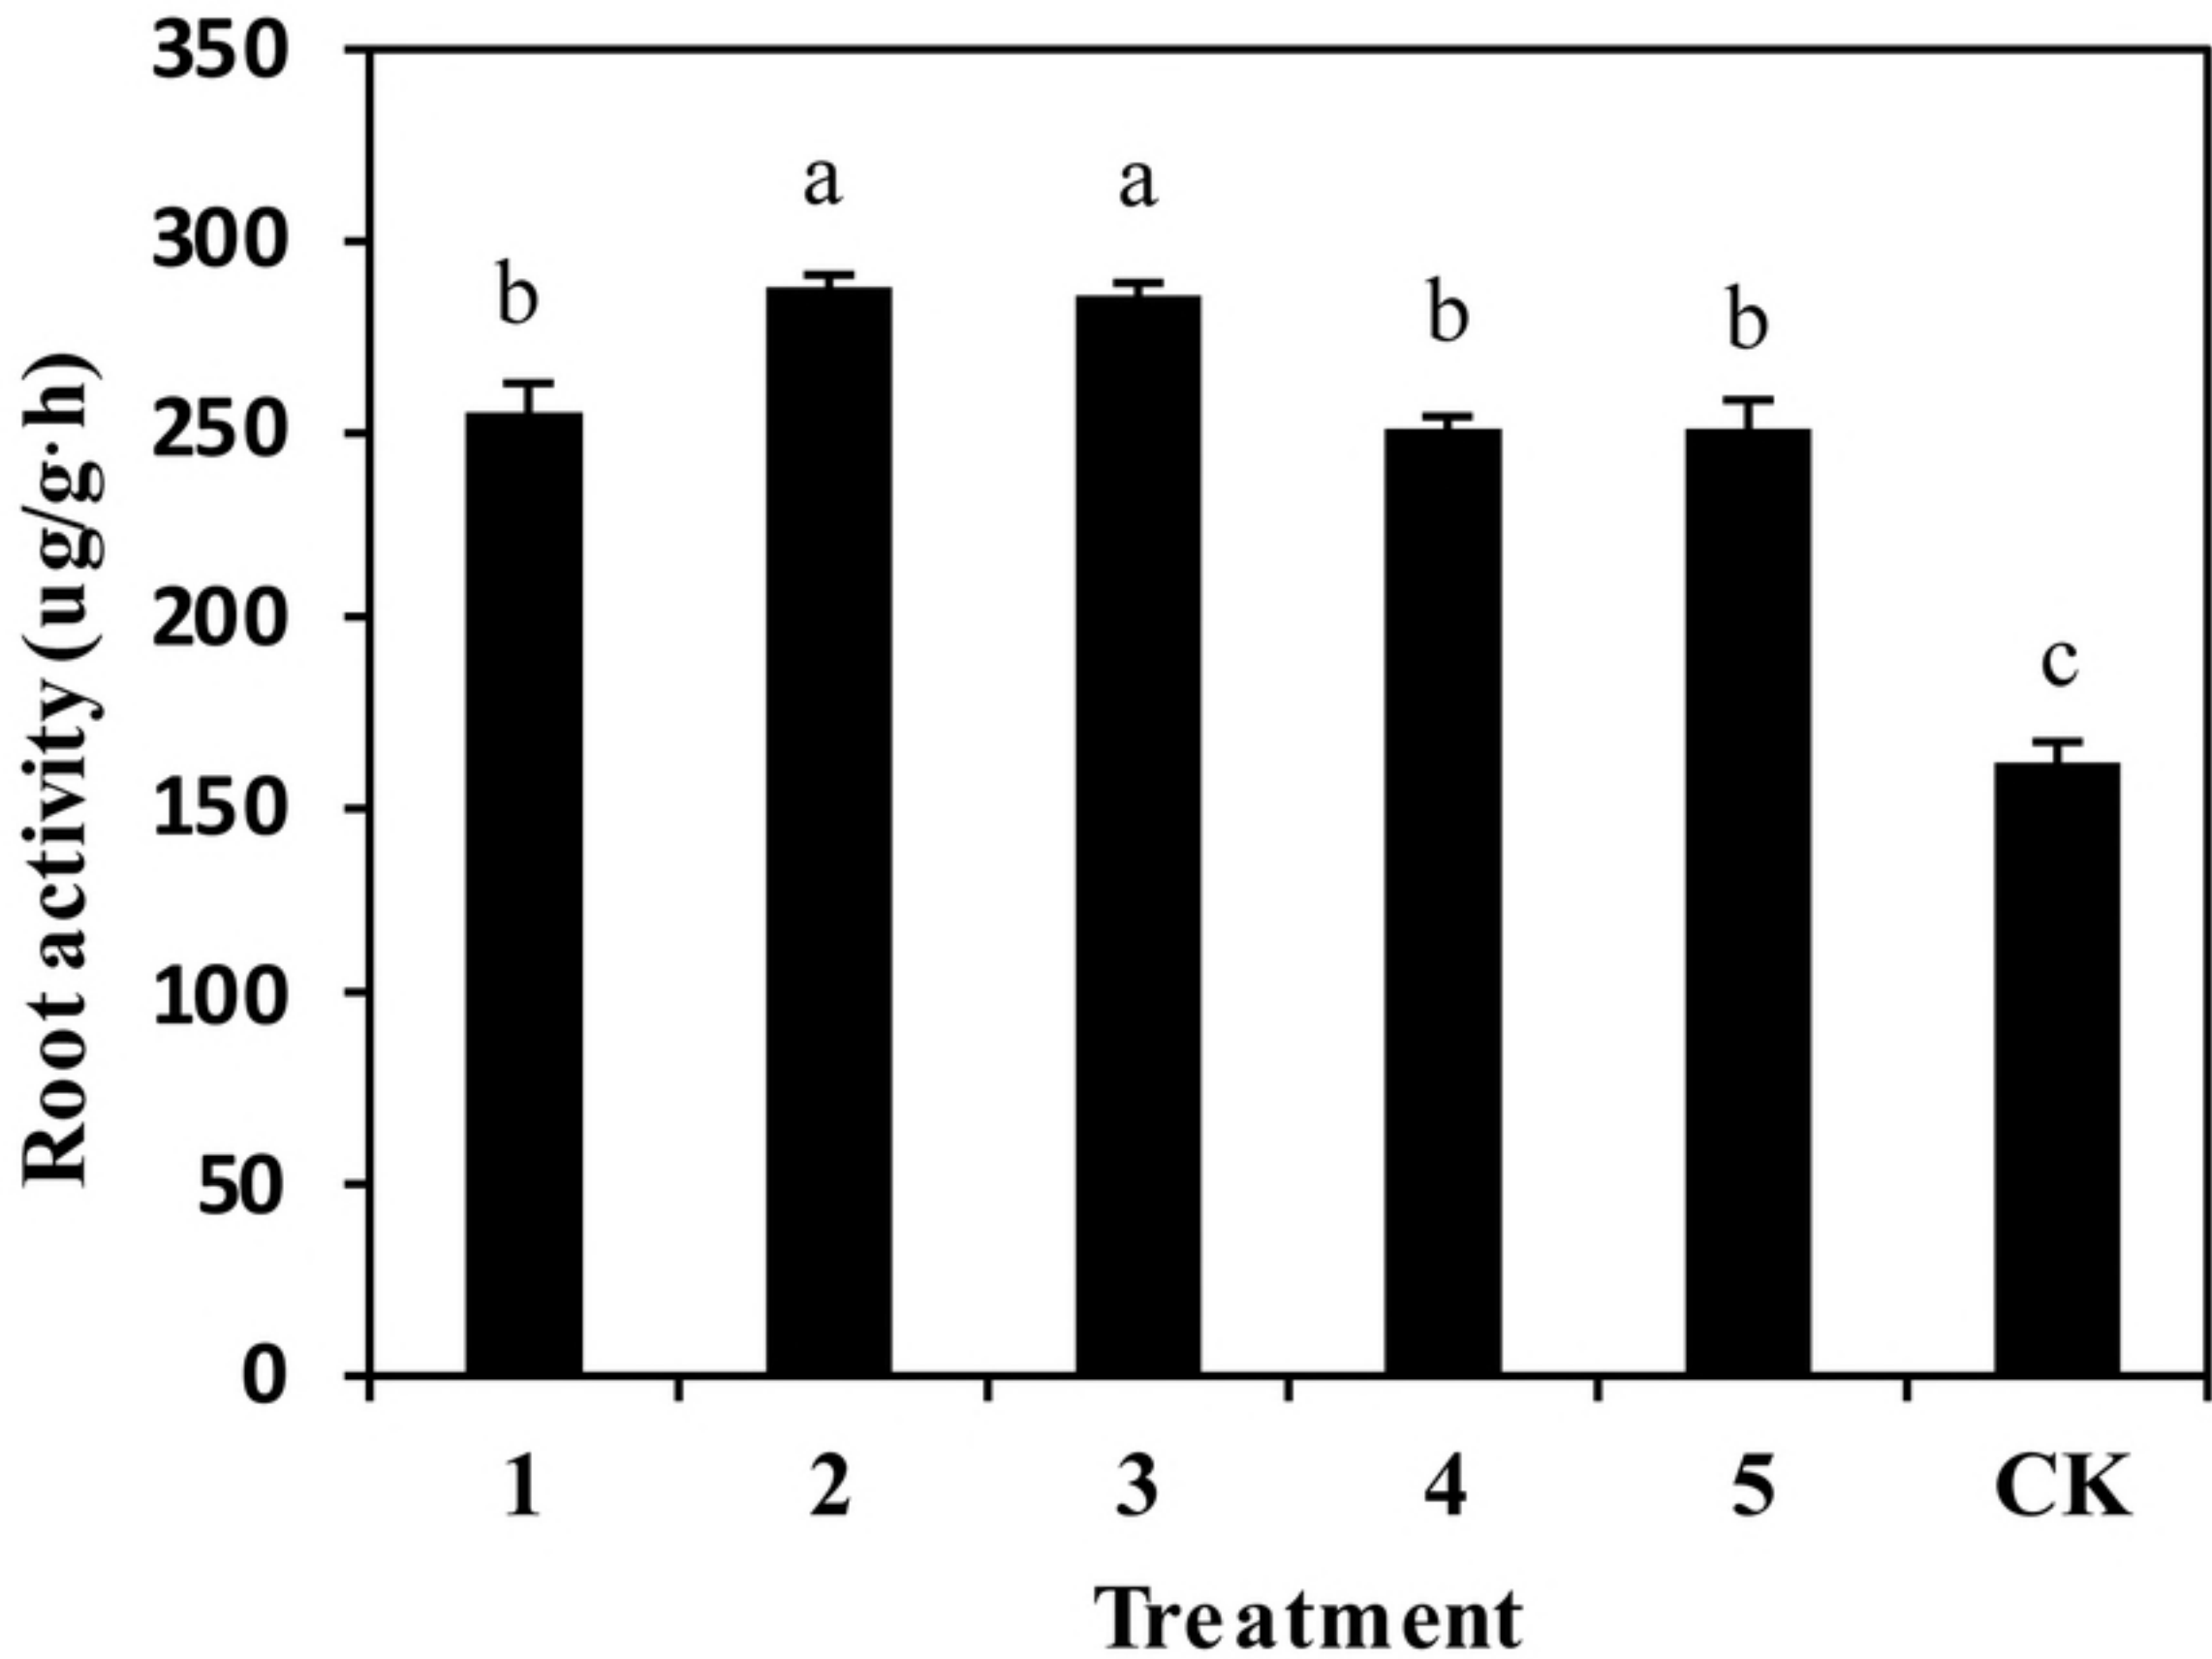



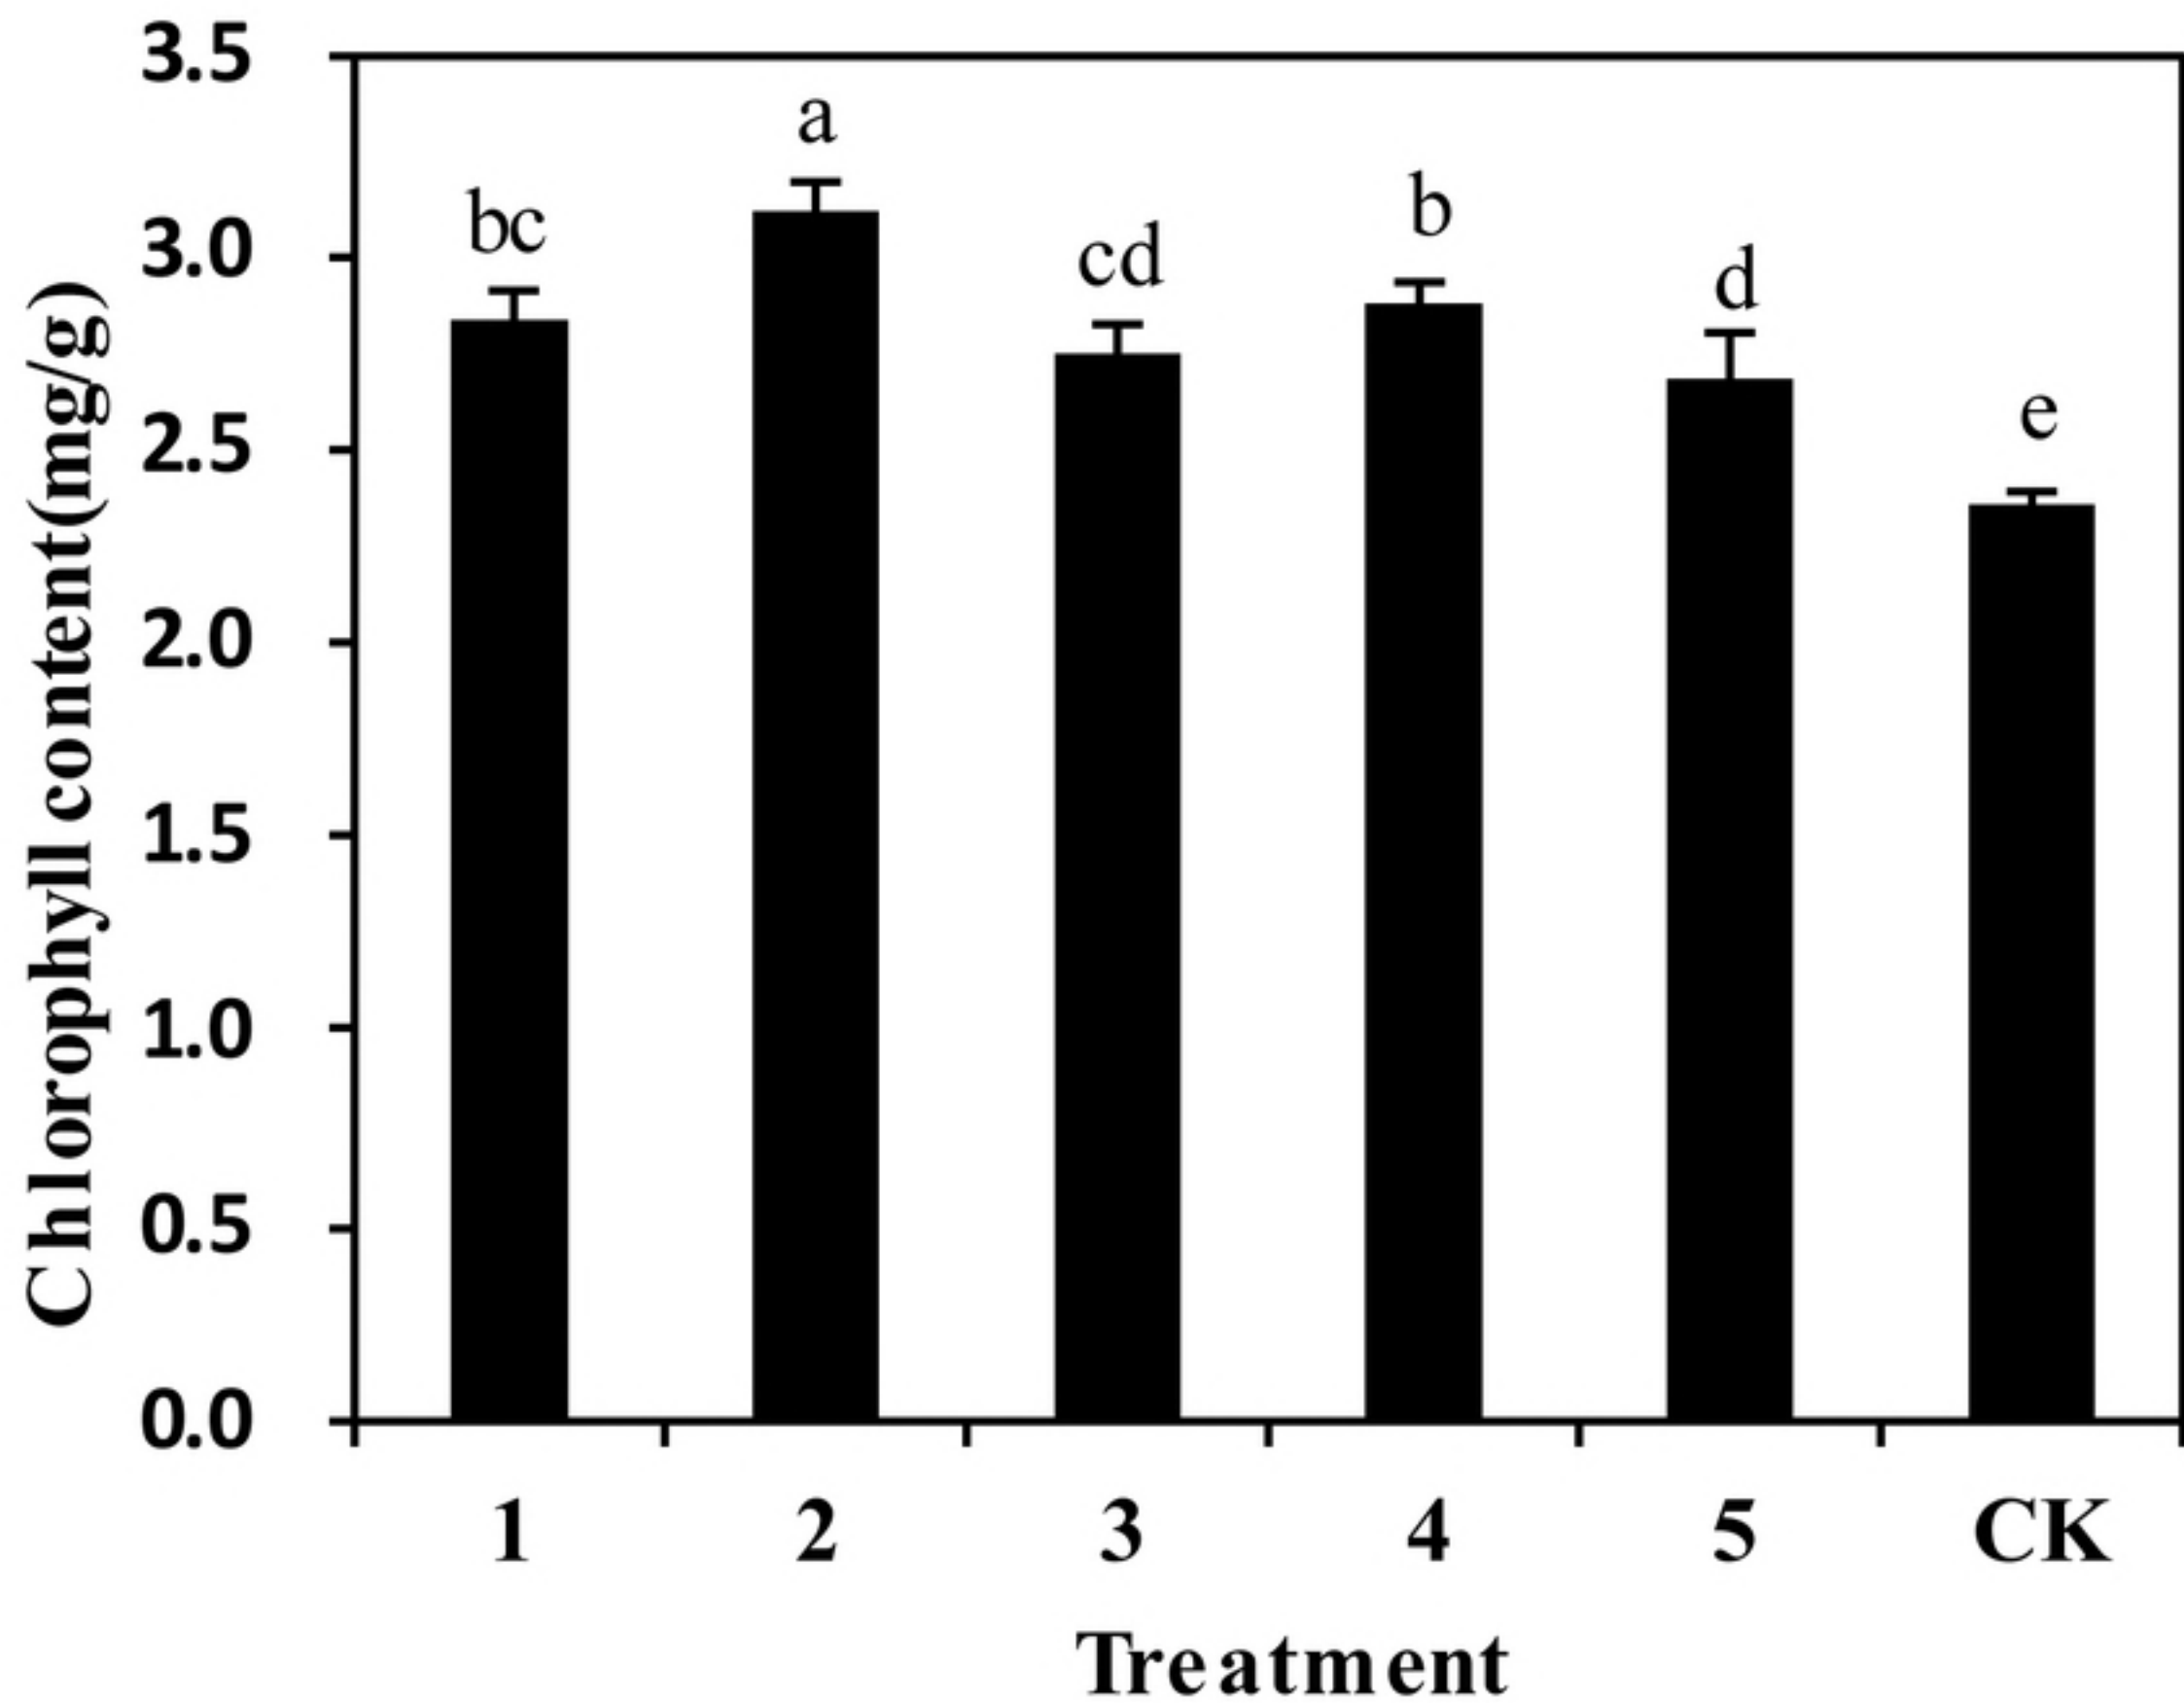

Source: https://www.biorxiv.org/content/10.1101/402529v1.full.pdf
